# Supplementary material for: Bringing Social Context Back In
Source: Oxford University Press journal article supplement (doi:10.1093/poq/nfab022), 2021-05-06
Supplement: nfab022_supplementary_data.pdf [file nfab022_supplementary_data.pdf]

**Supplementary Material for**  
**BRINGING SOCIAL CONTEXT BACK IN: ENRICHING POLITICAL**  
**PARTICIPATION SURVEYS WITH MEASURES OF SOCIAL INTERACTION**  
**FROM SOCIAL MEDIA CONTENT DATA**

*Public Opinion Quarterly*

**Authors**

Hjalmar Bang Carlsen, Assistant Professor, SODAS, Department of Sociology, University of Copenhagen.

Center for Social Data Science (SODAS), Øster Farimagsgade 5, 1353 København K, Denmark; e-mail: hc@sodas.ku.dk

Jonas Toubøl (Corresponding), Postdoc, Department of Sociology, University of Copenhagen.

Department of Sociology, Øster Farimagsgade 5, 1353 København K, Denmark; e-mail: jt@soc.ku.dk

Snorre Ralund, Research Assistant, SODAS, Department of Sociology, University of Copenhagen.

Center for Social Data Science (SODAS), Øster Farimagsgade 5, 1353 København K, Denmark; e-mail: jser@econ.ku.dk

**The supplementary material includes the following elements:**

- A. Content analysis of contentious expressions on social media
- B. Items included in focal variable, contentious activism
- C. Random intercept multi-level Poisson regression model of participation in political protest (0-4)
- D. OLS models for contentious interaction's effect on participation in contentious activism (0-4)
- E. Details of variables included
- F. Full list of estimates of model 2, table 5
- G. Online survey questionnaire

## A. Content analysis of contentious expressions on social media

In the following, we describe our second data source collected from Facebook and the procedure for automating content analysis using machine learning, allowing us to measure contentious expressions in the communications of the refugee solidarity movement. As we did not use a standard framework (Wang and Manning 2012) for text classification, we take some time to describe our approach, the model search and report the performance of the resulting classifier in relation to known baselines.

### *Facebook data*

We used data about interactions in Facebook groups to measure variation in group style of interaction along the dimension of contentiousness. First, 165 relevant Facebook groups were identified through a keyword search<sup>1</sup> using the search interface within Facebook. Social media data were then collected using the Facebook Graph API, publicly available. This allowed us to collect the online activity (posting, commenting, and liking) in 119 of the Facebook groups, amounting to 643,636 posts and comments, and more than 1.8 million likes. We then used this material to measure our focal independent variable contentious group style, using an automated version of content analysis.

### *Scaling Content Analysis with Machine Learning*

We measured the level of contentious activity in the Facebook groups. Using techniques from the field of natural language processing to extract information from the text, we automated the labeling process, allowing us to classify all 600,000+ comments and posts. By feeding machine learning algorithm labeled examples (a random sample of 12,500 posts and comments coded by two expert coders – i.e. two of the authors), we were able to train a model to differentiate between contentious and non-contentious activity. The following section will describe the procedure and the performance of the resulting model in more detail.

### *The labeled dataset*

We labeled a random sample from the original dataset using the coding scheme for contentiousness described in the main paper. The randomness sample means that we can cross-validate the performance of our classifier on the labeled subset and generalize to the whole dataset. Given the relative rarity of contentious acts in the predominantly humanitarian movement, we had to label a relatively large sample to ensure enough training samples of the rare class. A part of the labeled data only contained links (articles, or images) and no text was excluded and the results reported are after filtering. The final labeled sample includes 11,149 (93%) non-contentious training examples and 836 (7%) contentious. The skew is important in the evaluation of our classifier, where a conservative classifier always guessing non-contentious, would obtain a seemingly impressive accuracy of 93%. Therefore we also report measures suitable for unbalanced data in our evaluation: precision, recall, f1 score and the AUC score (Bradley 1997). Before training our classifiers we split the dataset into a training set (75%) used for training the classifier and for model selection and a test set (25%).

---

<sup>1</sup> The keywords were: refugee (flygtning), asylum (asyl), racism (racism), foreigner (udlænding), Venligbo (the Danish denomination for a large and new social movement which shows compassion toward refugees and others in need as its central goal), friends of refugees (flygtningevenner), intercultural (interkulturel), the Red Cross (Røde Kors), the Red Cross Youth (Røde Kors Ungdom), the Danish Refugee Council (Dansk Flygtningehjælp), DFUNK (the Danish Refugee Council's youth organization), Frivillignet (the volunteering organization of the Danish Refugee Council), Save the Children (Red Barnet), Save the Children Youth (Red Barnet Ungdom), and Amnesty International.

### Baselines

Before we present the final classifier used in the study, we present the results of a preliminary model search using more standard supervised learning algorithms for text classification. We then go on to describe our own classifier and the performance gains compared to baselines. However, bear in mind that the central goal in developing our own classifier was not to develop a new state-of-the-art approach, but rather to improve performance on this specific dataset.

For the baselines we used two standard ways of representing text as a vector: the document-term matrix, where each document is represented as a vector of word counts, and a reweighed version of the document-term matrix using the Term Frequency Inverse Document Frequency (TFIDF) weighing scheme. Documents were represented as (weighed) counts of unigrams (i.e. bigram information might have improved the baselines). We use the two different feature vectors as input to three for models: Naive Bayes, Support Vector Machine and Regularized Logistic Regression<sup>2</sup>. For model selection we searched for optimal hyperparameters using gridsearch<sup>3</sup> and a 5-split k-fold cross-validation. We report the following measures:

- *Accuracy*:  $\frac{TP+TN}{TP+TN+FP+FN}$ , where  $TP$  and  $TN$  are true positives and true negatives,  $FP$  and  $FN$  are false positives and false negatives. The accuracy expressing how often the classifier is right.
- *Precision*:  $\frac{TP}{TP+FP}$ . This expresses how often a positive classification (in this case a contentious label) is right. The measure tells us about the overestimation of the contentious label.
- *Recall*:  $\frac{TP}{TP+FN}$ . How many of the all contentious labels are predicted by the classifier. The recall measure tells us about the underestimation of the contentious label.
- *F1-score*:  $2 * \frac{Recall * Precision}{Recall + Precision}$ . This is a harmonic mean over the precision and recall. It tells you whether the model is able to balance a trade-off between precision and recall.
- *AUC-score*:  $AUC = \int_{-\infty}^{\infty} TPR(T)FPR(T) dT$ . Where  $T$  is the threshold defining the decision boundary of the classifier, and  $TPR$  and  $FPR$  are the true and false positive rates. This is the area under the Receiver-Operating-Characteristics Curve. It is used, in particular, for evaluating datasets with unbalanced classes (Bradley 1997).

From Table S1 we can see that the Support Vector Machine<sup>4</sup> with TFIDF input was marginally best in terms of accuracy (94.3%). However, none of the models were able to significantly outperform the accuracy of a conservative classifier always predicting 0 (non-contentious), and had severe problems with the Recall (i.e. had a strong bias for just predicting 0). Given these results, this led our efforts to develop a model utilizing more sophisticated features than just weighed word counts. The performance of our final classifier can also be seen in Table S1.

---

<sup>2</sup> We used the implementations of the algorithms found in the *sklearn* python package – <http://scikit-learn.org> (Pedregosa et al. 2011) .

<sup>3</sup> Parameters searched through include the smoothing term in the Naïve Bayes, the regularization strength in the Logistic Regression and Support Vector Machine, L1 or L2 norm in the error term of the logistic regression, and the type of kernel used in the Support Vector Machine.

<sup>4</sup> The optimal hyperparameters were: the kernel set to the radial basis function, the regularization term C set to 10, The Gamma term set to 0.1, and turning the shrinking heuristic off.

Table S1. Comparing the performance of the classifiers.

|                         | Accuracy     | AUC          | F1           | Precision    | Recall       |
|-------------------------|--------------|--------------|--------------|--------------|--------------|
| <b>Baselines</b>        |              |              |              |              |              |
| naive_bayes_countvec    | 0.930        | 0.822        | 0.425        | 0.476        | 0.384        |
| logistic_countvec       | 0.936        | 0.816        | 0.268        | 0.603        | 0.172        |
| svm_countvec            | 0.937        | 0.815        | 0.190        | 0.759        | 0.108        |
| naive_bayes_tfidf       | 0.940        | 0.879        | 0.297        | 0.717        | 0.187        |
| logistic_tfidf          | 0.941        | 0.858        | 0.323        | 0.737        | 0.207        |
| svm_tfidf               | 0.943        | 0.853        | 0.360        | 0.750        | 0.236        |
| <b>Final classifier</b> | <b>0.965</b> | <b>0.948</b> | <b>0.716</b> | <b>0.910</b> | <b>0.590</b> |

### Feature engineering using word embeddings

The following provides a brief overview of the variety of feature extraction techniques applied.

The main effort has been in utilizing information learning from the Word2Vec unsupervised learning method (Mikolov et al. 2013) to transfer knowledge between similar terms while learning. The method has gained considerable popularity in the natural language processing community, has seen recent introductions into the social sciences (Evans and Aceves 2016; Kozłowski et al. 2018), and is successfully used to improve many machine-learning tasks (see e.g. Baroni, Dinu, and Kruszewski 2014; Kim 2014; Schnabel et al. 2015). Put briefly, the Word2Vec model assigns each word a position in a vector space based on the context that word shares with other words in the corpus. Work within the field of natural language processing has, among other things, demonstrated that words close in vector space share similar semantic information (Schnabel et al. 2015).

The method allows us to learn from the co-occurrence patterns in the full dataset of 640,000+ posts, and to transfer this information when learning from our labels. The embedding model was trained on our dataset, using the open source python package *gensim* (Řehůřek & Sojka 2011), resulting in domain specific embeddings. Although not as general and high quality as embeddings trained on very large corpuses (e.g. the entirety of Wikipedia), we wanted it to capture the specific word similarities embedded in the practice of the movement.

We then use the resulting word embeddings for two purposes: First the embeddings were used as a dense (as opposed to the sparse document-term matrix) representation of each document by taking the mean vector representation over all words in a document. Secondly they were used as a way of learning label probabilities from neighbors in the vector space, as well as the word itself. Doing so attempts to counter problems with tokens that are rare or non-existent in the training data. The following section will describe this idea in more detail.

### Neighbor Enhanced Naive Bayes

Central to the features constructed is using information from neighbors in word space. We do this by first calculating (on the training set<sup>5</sup>) the probability of a contentious label given the word:  $P(\text{contentious} | w)$ . As many words rarely occur in the training set, even a 100% association with contentious statements might be a coincidence, so instead we allow each word to inherit the probability of a contentious label from its neighbors in vector space, and embed uncertainty into the probability by taking into account the occurrence count of the word.

<sup>5</sup> This is important to ensure no leakage of information from the training data to the test data.

A document (post or comment) is then treated not as a collection of words, but rather as a distribution of label probabilities from the words and its neighbors. From here, the distribution was represented with a variety of pooling and summarization methods: using only the word most highly associated with contentious labels (i.e. max pooling), summing the probabilities of the top five words, and an average of all words. Furthermore, the counts were combined into a neighborhood probability of a contentious label. The resulting vector contains no information on specific words, but only various summarizations of the words and their neighbors defined by the word embedding, plus an average vector space position of the document based the word positions. The procedure transforms a sparse document-term representation with 22,000 features (no. of unique tokens) into a dense representation with only 360 features.

#### *Intelligent model search*

The dense representation described above allows us to apply a much more greedy search for the best-performing model, with more complex transformations than the simple baseline models. Our model search was performed again using 5-split k-fold cross-validation, and the search was guided using state-of-the-art genetic algorithms for automated machine learning as described in Olson et al. (2016) and implemented in the python package *TPOT*. Instead of a brute force search through all combinations of different classification algorithms, hyperparameters, preprocessing schemes, and ensemble building, the genetic algorithm performs an intelligent search in this space of models using evolutionary principles of selection, mutation and combination (see details in the paper). The next section will report on the performance of the final classifier obtained after running the genetic algorithm for approximately 48 hours.

#### *Performance of the classifier*

The results of the final classifier along with comparisons to the baselines are reported in Table S1 and can be viewed graphically in Figure S1. Finally, a ROC Curve is plotted in Figure S2. All show a significant gain in performance compared to the baseline. It is worth noting that the classifier has a 0.9 precision score (meaning that, when guessing Contentious, it is right 90% of the time), but only a 0.59 recall, essentially telling us that the classifier is underestimating the true proportion of contentious posts in the movement. This bias is not necessarily a problem, unless it is distributed unequally across groups (our level of analysis is local refugee solidarity movement Facebook groups). A challenge in the current design is obtaining a measure of differential bias across groups, i.e. does the classifier perform equally well across groups in the dataset. It is very costly to estimate the variations across 119 individual groups, especially given the large skew in the distribution of labels (only 0.07 contentious documents). To estimate it with some certainty we would require a stratified sample for evaluation, approximating the size of our initial training sample. The problem of ensuring no differential bias will continue to be a challenge to studies employing supervised learning as measurement tool. However, for our current use case, using the final outputs of the classifier as an independent variable in a multilevel design, we are assuming that any potential bias in the classifier is not systematically driving any results in the multilevel regression analysis.

*Figure S1. Comparing the performance of the classifiers, bar chart.*

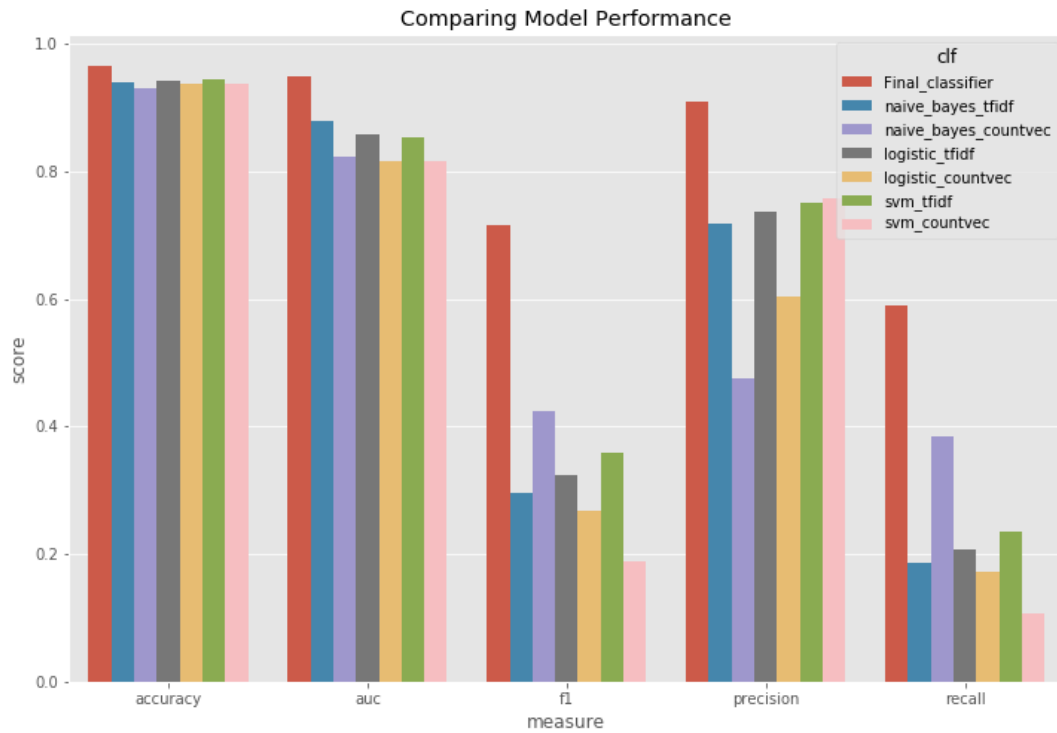

Figure S2. Comparing the performance of the classifiers using the Receiver Operating Curve

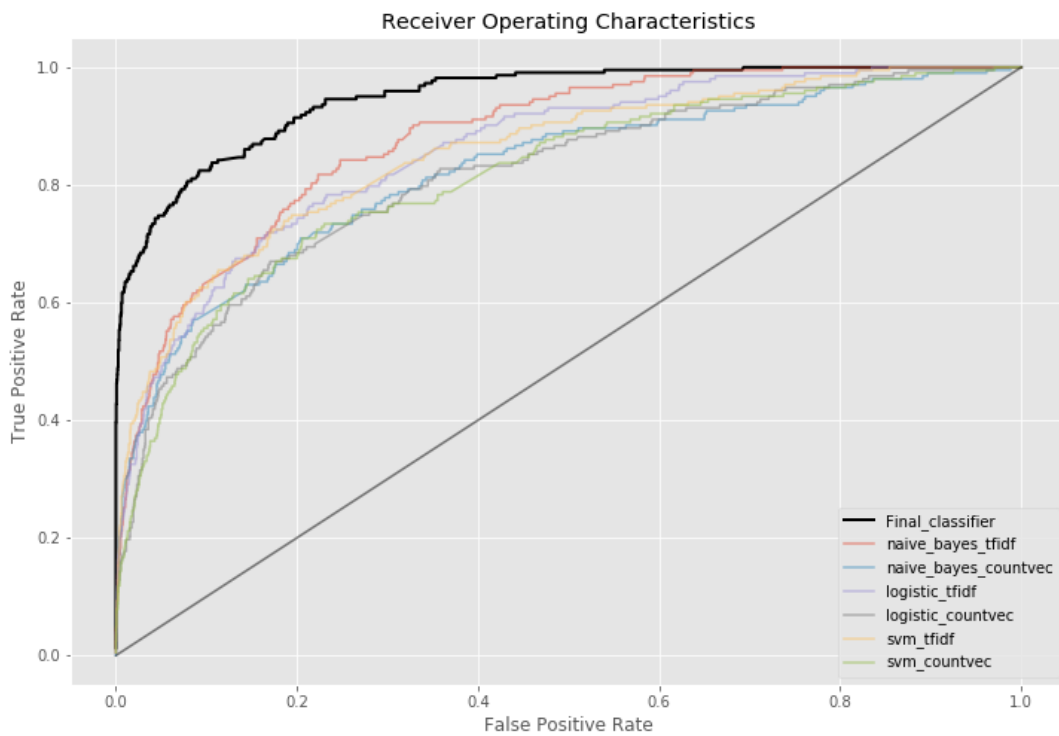

Sensitivity Analysis: Recall of the Classifier and Groupstyle Parameter Estimates

The above section reported the performance of the final classifier in relation to a set of baseline models. While almost any classification scheme will make errors, the central concern from a scientific perspective is that the error is randomly distributed and does not introduce artificial effects into our estimates. Systematic bias in natural language processing systems is an ongoing field of research, where systems have been demonstrated to be biased in relation to social class, gender, and age (Johansen, Hovy and Søgaard 2015; Hovy and Søgaard 2015; Kiritchenko & Mohammad 2018), and currently no system or method can provide any clear guarantees. This means that NLP as measurement device could potentially introduce complex artificial effects as a result of biases not distributed equally across social groups. To directly test the systematic bias we would need to estimate the performance of the classifier on each of the >100 groups. If using a random sampling scheme this would be very costly, further attenuated by the relative rarity of the positive case, i.e. frequency of contentious posts in the whole dataset.

Because direct assessment was not a viable option, we seek to address the same issue more indirectly. One factor in differential bias is that the training data contains an unequal number of examples from different "discursive groups", resulting in heightened uncertainty for less frequent groups. If some groups express themselves using more specific and rare words, with higher complexity and therefore higher ambivalence, this means that the classifier has less statistical information about these groups. This could potentially introduce a bias, where some groups are underestimated.

We investigate this potential issues by performing a sensitivity analysis, investigating the relation between our results and how much uncertainty we will allow our classifier before classifying a post as contentious. More precisely, we investigate how different choices of decision boundaries change our results, i.e. the regression coefficient of the group style variable.

The mechanics can be explained as follows: 1) The model used for measuring the contentiousness of each posts, outputs a probability estimate. 2) The binary classification – contentious/non-contentious – is made based on a threshold/decision boundary. 3) Instead of using the decision boundary optimized for highest accuracy, we manipulate it to see how it might affect our results.

Lowering the threshold means getting a higher recall, at the cost of lower precision (as evident from Figure S2). If we think of the problem in terms of recall, that some groups are systematically overlooked due to heightened uncertainty, we can investigate if changes in recall change the results. And if we think of it in terms of some groups being more subtle/less obvious and thus containing more false positives, we can see if model precision changes the result. As we are manipulating the decision boundary, we inevitably manipulate both the recall and precision at the same time, so we cannot separate the two, making our robustness analysis a combination of the two. If the two dimensions, precision and recall, reinforce each other in relation to an artificially induced effect we are concerned about, then it is problematic, but we think this is a good initial step in diagnosing potentially artificially induced effects.

Figure S3a reports on the relationship between the recall of the classifier and the regression estimate of the groupstyle variable and S3b relates it to precision. We report t-values instead of coefficients, in order to make comparisons possible as the scale of the group style variable changes with the threshold, and, furthermore, it makes significance levels transparent. What we want to see is that the effect is robust to the choice of decision boundary. Looking at S3a, we see that the results are robust to increasing the recall while lowering the precision to include less certain prediction into the measure of group style. A recall raised to 0.9 with a lowered precision to 0.5 yields very similar results, revealing that both type 1 and type 2 errors seem to be randomly distributed in relation to the outcome. Looking at figure S3b we see that more conservative classifiers, with a higher precision compared to our final model, initially raise the

t-value, however an overtly strict model will make the relationship vanish. It is expected that the results will be less clear using a very strict classifier, where the signal become too sparse.

*Figure S3. Robustness of the estimates in relation to different decision boundaries of the classifier resulting in different recall and precision scores*

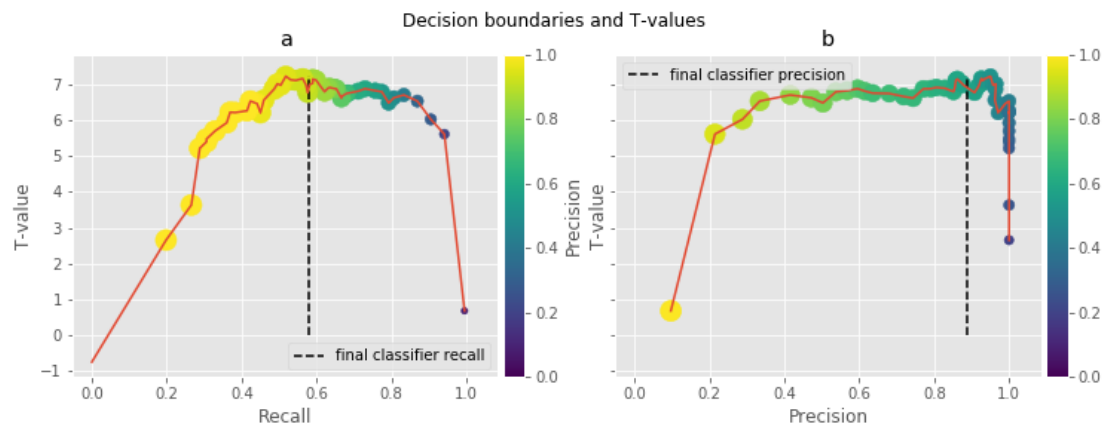

Notes: T-values from the regression of contentious activities on the groupstyle variable derived from the classifier is plotted for comparison. a) Reports on the relationship between the recall of the classifier and the regression coefficient of the groupstyle variable. The points are sized and colored by the precision of the classifier. b) Reports on the relationship between precision and the regression coefficients.

Overall, the results are robust to the choice of decision boundary, and effect sizes are robust to including predictions with higher uncertainty. We can therefore conclude that any bias introduced by the classifier is not related to differences in the amount of statistical information we have from different groups in our training data.



## References

- Baroni, Marco, Georgiana Dinu, and Germán Kruszewski. 2014. "Don't Count, Predict! A Systematic Comparison of Context-Counting vs. Context-Predicting Semantic Vectors." *ACL*, no. 1: 238–47.
- Bradley, Andrew P. "The use of the area under the ROC curve in the evaluation of machine learning algorithms." *Pattern recognition* 30, no. 7 (1997): 1145-1159.
- Evans, James A., and Pedro Aceves. "Machine translation: Mining text for social theory." *Annual Review of Sociology*. 42 (2016).
- Hovy, Dirk, and Anders Søgaard. "Tagging performance correlates with author age." *Proceedings of the 53rd Annual Meeting of the Association for Computational Linguistics and the 7th International Joint Conference on Natural Language Processing (Volume 2: Short Papers)*. 2015.
- Jørgensen, Anna, Dirk Hovy, and Anders Søgaard. 2015. "Challenges of studying and processing dialects in social media." *Proceedings of the Workshop on Noisy User-generated Text*.
- Kim, Yoon. 2014. "Convolutional Neural Networks for Sentence Classification." *ArXiv:1408.5882 [Cs]*, August.
- Kiritchenko, Svetlana, and Saif Mohammad. 2018. "Examining Gender and Race Bias in Two Hundred Sentiment Analysis Systems." *Proceedings of the Seventh Joint Conference on Lexical and Computational Semantics*.
- Kozłowski, Austin C., Matt Taddy, and James A. Evans. "The geometry of culture: Analyzing meaning through word embeddings." *arXiv preprint arXiv:1803.09288* (2018).
- Mikolov, Tomas, Kai Chen, Greg Corrado, and Jeffrey Dean. 2013. "Efficient Estimation of Word Representations in Vector Space." *ArXiv:1301.3781 [Cs]*, January.
- Olson, Randal S. et al. 2016. "Automating Biomedical Data Science Through Tree-Based Pipeline Optimization." Pp. 123–37 in *Applications of Evolutionary Computation: 19th European Conference, EvoApplications 2016*, Porto, Portugal, March 30 -- April 1, 2016, Proceedings, Part I, edited by G. Squillero and P. Burelli. Cham: Springer International Publishing.
- Řehůřek, Radim, and Petr Sojka. 2011. "Gensim—statistical semantics in python." *statistical semantics; gensim; Python; LDA; SVD*.
- Schnabel, Tobias, Igor Labutov, David M. Mimno, and Torsten Joachims. 2015. "Evaluation Methods for Unsupervised Word Embeddings." *EMNLP*, 298–307.
- Wang, Sida, and Christopher D. Manning. "Baselines and bigrams: Simple, good sentiment and topic classification." In *Proceedings of the 50th annual meeting of the association for computational linguistics: Short papers-volume 2*, pp. 90-94. Association for Computational Linguistics, 2012.

**B. Items included in focal variable, contentious activism**

| Activities                                | Contentious activism? |    |
|-------------------------------------------|-----------------------|----|
|                                           | Yes                   | No |
| 1. Posting on Facebook                    |                       | ×  |
| 2. Liking and sharing Facebook posts      |                       | ×  |
| 3. Petitioning                            | ×                     |    |
| 4. Collecting and donating materials      |                       | ×  |
| 5. Collecting and donating money          |                       | ×  |
| 6. Intercultural activity                 |                       | ×  |
| 7. Contact-person for refugees            |                       | ×  |
| 8. Demonstrations and happenings          | ×                     |    |
| 9. Civil disobedience/direct action       | ×                     |    |
| 10. Legal assistance                      |                       | ×  |
| 11. Assisting newly arrived refugees      |                       | ×  |
| 12. Illegal transportation of refugees    | ×                     |    |
| 13. Hiding refugees from authorities      | ×                     |    |
| 14. Econ. support to underground refugees | ×                     |    |
| 15. Other support to underground refugees | ×                     |    |
| 16. Refugees living in private home       |                       | ×  |

Note: Items 1 and 2 concerning activity on Facebook cannot be allocated to any of the categories because the activity could be both political protest, as in posting political statements, and non-contentious, as in coordination donations to refugees.

### C. Random intercept multi-level Poisson regression model of participation in political protest (0-4)

| Covariate                      | Coefficient | S.E.      | P-value |
|--------------------------------|-------------|-----------|---------|
| <u>Group level</u>             |             |           |         |
| Contentious group style        | 3.606       | 1.307     | 0.006   |
| Contentious framing            | 0.283       | 0.206     | 0.169   |
| <u>Individual level</u>        |             |           |         |
| Personal network               | 0.016       | 0.035     | 0.653   |
| Organizational network         | 0.003       | 0.141     | 0.984   |
| Political civil society embed. | 0.051       | 0.019     | 0.009   |
| Other civil society embed.     | -0.005      | 0.016     | 0.756   |
| Active before September        | 0.266       | 0.067     | 0.000   |
| Active before September        | -0.126      | 0.031     | 0.000   |
| History of activism            | 0.176       | 0.035     | 0.000   |
| Emotional response             | 0.290       | 0.049     | 0.000   |
| Self-transcendent values       | 0.038       | 0.019     | 0.044   |
| Self-enhancement values        | -0.048      | 0.023     | 0.033   |
| Political attitude             | -0.190      | 0.041     | 0.000   |
| <i>Religion</i>                |             |           |         |
| Non-believer                   |             | Reference |         |
| Danish National Church         | -0.267      | 0.084     | 0.001   |
| Islam                          | 0.013       | 0.231     | 0.956   |
| Other                          | 0.049       | 0.146     | 0.737   |
| Degree of urbanization         | 0.073       | 0.031     | 0.018   |
| Income                         | 0.004       | 0.041     | 0.930   |
| <i>Occupation</i>              |             |           |         |
| Full time                      |             | Reference |         |
| Part time                      | -0.117      | 0.128     | 0.360   |
| Self-employed                  | 0.048       | 0.112     | 0.670   |
| Student                        | 0.151       | 0.168     | 0.370   |
| Unemployed                     | -0.076      | 0.181     | 0.676   |
| Early retirement               | -0.015      | 0.177     | 0.932   |
| Retired                        | -0.286      | 0.188     | 0.128   |
| Other                          | -0.217      | 0.166     | 0.190   |
| Worktime                       | -0.024      | 0.030     | 0.424   |
| Highest level of education     | 0.035       | 0.036     | 0.330   |
| <i>Gender</i>                  |             |           |         |
| Female                         |             | Reference |         |
| Male                           | 0.041       | 0.093     | 0.660   |
| Identify as neither            | 0.424       | 0.327     | 0.195   |
| Children                       | 0.002       | 0.076     | 0.983   |
| Age                            | 0.030       | 0.023     | 0.193   |
| Age <sup>2</sup>               | 0.000       | 0.000     | 0.292   |
| Refugee                        | -0.035      | 0.194     | 0.855   |
| Constant                       | -2.953      | 0.718     | 0.000   |
| <i>Random Effects</i>          |             |           |         |
| Variance of constant           | 0.023       | 0.015     |         |
| Degrees of freedom             |             | 34        |         |
| Log-likelihood                 |             | -1354.973 |         |

Note: \* = p-value < 0.05; \*\* = p-value < 0.01; \*\*\* = p-value < 0.001. Total individual observations in all models = 1,259. Total groups in all = 75. Coefficients are unstandardized.

**D. OLS models for contentious interaction's effect on participation in contentious activism (0-4)**

| Covariate                      | Model 1    |           | Model 2    |           | Model 3    |           | Model 4    |           | Model 5    |           |
|--------------------------------|------------|-----------|------------|-----------|------------|-----------|------------|-----------|------------|-----------|
|                                | Coef.      | Std. Err. |
| <b>Group level</b>             |            |           |            |           |            |           |            |           |            |           |
| Cont. social interaction       | 8.258***   | 0.819     | 4.525***   | 0.817     | -          | -         | 4.886***   | 0.806     | -          | -         |
| Contentious framing            | -          | -         | 0.488**    | 0.187     | 0.695***   | 0.186     | 0.467*     | 0.185     | 0.691***   | 0.184     |
| <b>Individual level</b>        |            |           |            |           |            |           |            |           |            |           |
| Personal network               | -          | -         | 0.025      | 0.026     | 0.032      | 0.027     | -          | -         | -          | -         |
| Organizational network         | -          | -         | -0.049     | 0.099     | -0.089     | 0.100     | -          | -         | -          | -         |
| Political civil society embed. | -          | -         | 0.044**    | 0.044     | 0.045**    | 0.015     | 0.048**    | 0.014     | 0.049**    | 0.014     |
| Other civil society embed.     | -          | -         | -0.009     | 0.012     | -0.010     | 0.012     | -          | -         | -          | -         |
| Active before September        | -          | -         | 0.232***   | 0.048     | 0.245***   | 0.048     | 0.227***   | 0.047     | 0.242***   | 0.048     |
| History of activism            | -          | -         | -0.089***  | 0.020     | -0.096***  | 0.020     | -0.086***  | 0.019     | -0.094***  | 0.020     |
| History of refugee activism    | -          | -         | 0.149***   | 0.025     | 0.159***   | 0.025     | 0.152***   | 0.025     | 0.163***   | 0.025     |
| Emotional response             | -          | -         | 0.152***   | 0.025     | 0.154***   | 0.026     | 0.146***   | 0.025     | 0.148***   | 0.026     |
| Self-transcendent values       | -          | -         | 0.035*     | 0.013     | 0.035*     | 0.014     | 0.037**    | 0.013     | 0.038**    | 0.013     |
| Self-enhancement values        | -          | -         | -0.044**   | 0.017     | -0.039*    | 0.017     | -0.044**   | 0.016     | -0.036*    | 0.016     |
| Political attitude             | -          | -         | -0.150***  | 0.029     | -0.155***  | 0.029     | -0.140***  | 0.028     | -0.144***  | 0.029     |
| <b>Religion</b>                |            |           |            |           |            |           |            |           |            |           |
| Non-believer                   | -          | -         | Reference  |           | Reference  |           | Reference  |           | Reference  |           |
| Danish National Church         | -          | -         | -0.238***  | 0.052     | -0.249***  | 0.053     | -0.248***  | 0.049     | -0.267***  | 0.050     |
| Islam                          | -          | -         | -0.012     | 0.192     | -0.013     | 0.195     | -0.016     | 0.187     | -0.010     | 0.189     |
| Other                          | -          | -         | 0.038      | 0.115     | 0.021      | 0.116     | 0.040      | 0.114     | 0.020      | 0.116     |
| Degree of urbanization         | -          | -         | 0.086      | 0.021     | 0.119***   | 0.020     | 0.081      | 0.020     | 0.120***   | 0.019     |
| Income                         | -          | -         | 0.000      | 0.030     | 0.001      | 0.030     | -          | -         | -          | -         |
| <b>Occupation</b>              |            |           |            |           |            |           |            |           |            |           |
| Full time                      | -          | -         | Reference  |           | Reference  |           | -          | -         | -          | -         |
| Part time                      | -          | -         | -0.098     | 0.091     | -0.118     | 0.092     | -          | -         | -          | -         |
| Self-employed                  | -          | -         | 0.067      | 0.087     | 0.101      | 0.087     | -          | -         | -          | -         |
| Student                        | -          | -         | 0.095      | 0.013     | 0.113      | 0.129     | -          | -         | -          | -         |
| Unemployed                     | -          | -         | -0.044     | 0.014     | -0.050     | 0.141     | -          | -         | -          | -         |
| Early retirement               | -          | -         | 0.023      | 0.136     | -0.001     | 0.138     | -          | -         | -          | -         |
| Retired                        | -          | -         | -0.209     | 0.014     | -0.235     | 0.137     | -          | -         | -          | -         |
| Other                          | -          | -         | -0.195     | 0.120     | -0.219     | 0.121     | -          | -         | -          | -         |
| Worktime                       | -          | -         | -0.012     | 0.022     | -0.016     | 0.023     | -          | -         | -          | -         |
| Highest level of education     | -          | -         | 0.035      | 0.027     | 0.047      | 0.027     | -          | -         | -          | -         |
| <b>Gender</b>                  |            |           |            |           |            |           |            |           |            |           |
| Female                         | -          | -         | Reference  |           | Reference  |           | -          | -         | -          | -         |
| Male                           | -          | -         | 0.038      | 0.070     | 0.043      | 0.071     | -          | -         | -          | -         |
| Identify as neither            | -          | -         | 0.465      | 0.314     | 0.518      | 0.317     | -          | -         | -          | -         |
| Children                       | -          | -         | 0.000      | 0.059     | -0.018     | 0.060     | -          | -         | -          | -         |
| Age                            | -          | -         | 0.025      | 0.017     | 0.024      | 0.017     | -          | -         | -          | -         |
| Age <sup>2</sup>               | -          | -         | 0.000      | 0.000     | 0.000      | 0.000     | -          | -         | -          | -         |
| Refugee                        | -          | -         | 0.027      | 0.144     | 0.021      | 0.145     | -          | -         | -          | -         |
| Constant                       | 0.484***   | 0.046     | -1.569**   | 0.531     | -1.705***  | 0.537     | -0.796**   | 0.251     | -0.980***  | 0.253     |
| R <sup>2</sup>                 | 7.49       |           | 28.83      |           | 27.05      |           | 27.46      |           | 25.31      |           |
| Log likelihood                 | -1,671.090 |           | -1,505.966 |           | -1,521.554 |           | -1,518.030 |           | -1,536.367 |           |
| Degrees of freedom             | 2          |           | 34         |           | 33         |           | 15         |           | 14         |           |

Note: \*= $p < 0.05$ ; \*\*= $p < 0.01$ ; \*\*\*= $p < 0.001$ . Coefficients are unstandardized.  $n = 1,259$

**E. Details of variables included**

| <i>Variable</i>                          | <i>Description</i>                                                                                                                                                                                                                                                                                  |
|------------------------------------------|-----------------------------------------------------------------------------------------------------------------------------------------------------------------------------------------------------------------------------------------------------------------------------------------------------|
| Political protest                        | Counts seven kinds of political protest the respondent reports having taken part in within the last year on a scale from 0-4. It was reduced from 0-7 to 0-4 to avoid small cell counts and outlier effects in the high end of the scale. The kinds of activism counted are detailed in Appendix B. |
| Contentiousness of social interaction    | Based on the analysis of all social media contents data in the activists' Facebook groups, it measures the share of posts and comments with contentious content on a scale from 0-1. Supervised machine learning was utilized to construct the classifier. (see Appendix A)                         |
| Contentious framing                      | Binary variable measuring whether the activist Facebook groups' official self-description defines the groups' purpose as including contentious politics <i>or</i> not. Based on human coding of all the self-description conducted by researchers with extensive contextual knowledge.              |
| Personal network                         | Measures on a scale from 0-2, whether the respondent reports having been recruited through strong ties networks (2), weak ties network (1) or whether personal network did not play a role in recruitment (0).                                                                                      |
| Organizational network                   | Binary measure of whether the respondent reports having been recruited through their organizational network (e.g. being encouraged to join the movement or take action at meeting or in newsletter from an association) (1) <i>or</i> not (0).                                                      |
| Political civil society embeddedness     | Additive index ranging 0-9 counting not being member (0), having been member (1), being a passive member (2) or being active member (3) of a: i) union, ii) political party, iii) non-governmental organization.                                                                                    |
| Non-political civil society embeddedness | Additive index ranging 0-9 counting not being a member (0), having been a member (1), being a passive member (2) or being an active member (3) of a: i) leisure club (e.g. sport, cultural), ii) religious community, iii) non-governmental organization.                                           |
| Emotional response                       | Additive index counting whether the respondent to a high or very high degree felt: 1) compassion with the refugees, 2) responsible for helping, 3) angry that the authorities and politicians did not take care of the refugees, 4) ashamed that Danish society was not more welcoming.             |
| Income                                   | Personal yearly gross income in 5 categories with 1=lowest income level; 5=highest income level.                                                                                                                                                                                                    |
| Worktime                                 | Respondent's assessment on a scale from 0 to 5 of the extent to which work or education takes up an amount of time that limits the respondent's engagement in the refugee cause.                                                                                                                    |
| Highest level of education               | Highest level of education attained: 1) Primary and lower secondary education, 2) General upper secondary education, 3) Vocational upper secondary education and training, 4) Short- and medium cycle tertiary education, 5) Long-cycle tertiary education.                                         |
| Degree of urbanization                   | Measures whether the respondent live in a: 1) city, 2) a suburb, 3) town, 4) village, or 5) an isolated house/farm.                                                                                                                                                                                 |
| Children in household                    | Binary measure of whether the respondent reports that children are part of the household <i>or</i> not.                                                                                                                                                                                             |
| Age                                      | Calculated from respondent reported year of birth.                                                                                                                                                                                                                                                  |

|                                   |                                                                                                                                                                                                                                                                                                                                                                                                       |
|-----------------------------------|-------------------------------------------------------------------------------------------------------------------------------------------------------------------------------------------------------------------------------------------------------------------------------------------------------------------------------------------------------------------------------------------------------|
| Refugee                           | Binary measure of whether the respondent came to Denmark as a refugee or immigrant, <i>or</i> was born in Denmark.                                                                                                                                                                                                                                                                                    |
| Active before September           | Binary measure of whether the respondent was active in the movement before the large mobilization in September 2015 <i>or</i> joined the movement as part of the mobilization.                                                                                                                                                                                                                        |
| Prior history of activism         | Additive index of respondent's participation in the following activities before September 2015 not related to the refugee issue: 1) petitioning, 2) boycotting or political consumerism, 3) demonstration, 4) political meetings, 5) directly influence politicians or civil servants, 6) donated or collected money to a political cause, 7) expressed political opinions in the media or 8) online. |
| Prior history of refugee activism | Same as <i>Prior history of activism</i> but counts activities related to the refugee issue.                                                                                                                                                                                                                                                                                                          |
| Self-transcendent values          | Value scale constructed from standard items in Shalom Schwartz' basic human values theory as operationalized in The European Social Survey questionnaire.                                                                                                                                                                                                                                             |
| Self-enhancement values           | Value scale constructed from standard items in Shalom Schwartz' basic human values theory as operationalized in The European Social Survey questionnaire.                                                                                                                                                                                                                                             |
| Political attitude                | Left-right political scale.                                                                                                                                                                                                                                                                                                                                                                           |
| Frequency of church attendance    | Measure of how often the respondent report attending religious sermons.                                                                                                                                                                                                                                                                                                                               |
| Occupation                        | Nominal variable with the categories: 1) full-time employed, 2) part-time employed, 3) self-employed, 4) student, 5) unemployed, 6) on early retirement, 7) retired, 8) other.                                                                                                                                                                                                                        |
| Gender                            | Nominal variable with the categories: 1) female, 2) male, 3) does not identify as female or male.                                                                                                                                                                                                                                                                                                     |
| Religion                          | Nominal variable with the categories: 1) non-believer, 2) Danish National Church (protestant), 3) Islam, 4) other denomination.                                                                                                                                                                                                                                                                       |

**F. Full list of estimates of model 2, table 5**

| Covariate                      | Coef.  | Std. Err. | P-value |
|--------------------------------|--------|-----------|---------|
| <u>Group level</u>             |        |           |         |
| Political composition          | -0.764 | 0.446     | 0.087   |
| Cont. interactional context    | 5.301  | 0.841     | 0.000   |
| Contentious framing            | 0.393  | 0.190     | 0.039   |
| <u>Individual level</u>        |        |           |         |
| Political civil society embed. | 0.048  | 0.014     | 0.000   |
| Active before September        | 0.225  | 0.047     | 0.000   |
| History of activism            | -0.085 | 0.019     | 0.000   |
| History of refugee activism    | 0.149  | 0.025     | 0.000   |
| Emotional response             | 0.146  | 0.025     | 0.000   |
| Self-transcendent values       | 0.037  | 0.013     | 0.006   |
| Self-enhancement values        | -0.044 | 0.016     | 0.006   |
| Political attitude             | -0.140 | 0.028     | 0.000   |
| <i>Religion</i>                |        |           |         |
| Non-believer                   |        | Reference |         |
| Danish National Church         | -0.246 | 0.049     | 0.000   |
| Islam                          | -0.017 | 0.186     | 0.926   |
| Other                          | 0.053  | 0.114     | 0.642   |
| Degree of urbanization         | 0.076  | 0.020     | 0.000   |
| Constant                       | -0.546 | 0.291     | 0.061   |
| R <sup>2</sup>                 |        | 0.276     |         |
| Log likelihood                 |        | -1,516.55 |         |
| Degrees of freedom             |        | 16        |         |

Notes: Coefficients are unstandardized. n=1,259.

## G. Online survey questionnaire

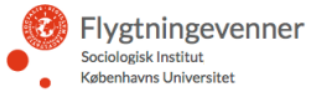

Hent ufærdigt spørgeskema Afslut og nulstil spørgeundersøgelsen

### Kære flygtningeven!

Tak fordi du vil deltage!

I det følgende stiller vi en række spørgsmål om din aktivitet i forbindelse med flygtningesagen. Det tager ca. 15 minutter.

**Alle dine svar bliver behandlet fortroligt og opbevaret forsvarligt af forskere fra Københavns Universitet.**

Dertil vil du være anonym i alle fremstillinger og vi bruger kun dine svar i forskningsøjemed.

- Dine svar vil blive gemt løbende, og du kan til enhver tid bruge knapperne 'Genoptag senere' og 'Hent ufærdigt spørgeskema' for at afbryde spørgeskemaet og færdiggøre det på et andet tidspunkt.
- Hvis du ønsker at gå tilbage til et tidligere spørgsmål, så benyt knappen 'Forrige' - benyt **IKKE** din browsers Tilbage-knap, da dette kan afbryde spørgeskemaet.
- Hvis du ønsker at slette alle dine svar og evt. starte forfra, så benyt knappen 'Afslut og nulstil'.

Har du andre spørgsmål eller kommentarer kan du kontakte os på [flygtningevenner@soc.ku.dk](mailto:flygtningevenner@soc.ku.dk)

Med venlig hilsen,

Peter Gundelach og Jonas Toubøl  
Sociologisk Institut, Københavns Universitet

Næste





**Flygtningevenner**  
Sociologisk Institut  
Københavns Universitet

Genoptag senere Afslut og nulstil spørgeundersøgelsen

0%

Tak fordi du vil tage dig tid til at besvare dette spørgeskema.  
I de første spørgsmål vil vi spørge til din aktivitet på Facebook i forbindelse med flygtningesagen.

Er [Ukendt gruppe] den gruppe du primært følger på Facebook?

- Ja
- Nej, jeg følger primært en anden gruppe
- Nej, jeg bruger ikke Facebook

Hvilken gruppe følger du primært på Facebook?

Vælg venligst...

ⓘ Vælg **Anden gruppe** (nederste valgmulighed) hvis din gruppe ikke fremgår på listen.

Forrige

Næste



**Flygtningevenner**  
Sociologisk Institut  
Københavns Universitet

Genoptag senere Afslut og nulstil spørgeundersøgelsen

1%

Hvornår meldte du dig ind i *Dansk Flygtningehjælp*?

- I forbindelse med eller efter at flygtningestrømmen nåede Danmark i september 2015
- Jeg meldte mig ind før september 2015
- Ved ikke/husker ikke

Hjalmar Bang Carlsen, Jonas Toubøl and Snorre Ralund

17



**Flygtningevenner**  
Sociologisk Institut  
Københavns Universitet

Genoptag senere Afslut og nulstil spørgeundersøgelsen

3%

Er du selv kommet hertil som flygtning, indvandret eller familiesammenført?

Ja  
 Nej

Hvilket år kom du til Danmark?

🔴 Skriv et årstal mellem 1916 og 2016, og brug 4 cifre - fx 1980.  
Lad feltet være tomt hvis du ikke kender svaret.

Forrige

Næste



**Flygtningevenner**  
Sociologisk Institut  
Københavns Universitet

Genoptag senere Afslut og nulstil spørgeundersøgelsen

5%

Var der nogen, der opfordrede dig til at melde dig ind i Dansk Flygtningehjælp?

|                                                          | Via Facebook             | Ved personlig henvendelse |
|----------------------------------------------------------|--------------------------|---------------------------|
| Personer som jeg var aktive i flygtningesagen sammen med | <input type="checkbox"/> | <input type="checkbox"/>  |
| Nære venner                                              | <input type="checkbox"/> | <input type="checkbox"/>  |
| Bekendte                                                 | <input type="checkbox"/> | <input type="checkbox"/>  |
| Kolleger                                                 | <input type="checkbox"/> | <input type="checkbox"/>  |
| Nærmeste familie                                         | <input type="checkbox"/> | <input type="checkbox"/>  |

🔴 Sæt gerne flere krydser.

Blev du opfordret til at melde dig ind gennem en forening eller sammenslutning du har tilknytning til?  
F.eks. via et nyhedsbrev eller til et møde.

Ja  
 Nej



**Flygtningevenner**  
Sociologisk Institut  
Københavns Universitet

Genoptag senere Afslut og nulstil spørgeundersøgelsen

---

5%

Var der nogen, der opfordrede dig til at melde dig ind i Dansk Flygtningehjælp?

|                                                          | Via Facebook             | Ved personlig henvendelse |
|----------------------------------------------------------|--------------------------|---------------------------|
| Personer som jeg var aktive i flygtningesagen sammen med | <input type="checkbox"/> | <input type="checkbox"/>  |
| Nære venner                                              | <input type="checkbox"/> | <input type="checkbox"/>  |
| Bekendte                                                 | <input type="checkbox"/> | <input type="checkbox"/>  |
| Kolleger                                                 | <input type="checkbox"/> | <input type="checkbox"/>  |
| Nærmeste familie                                         | <input type="checkbox"/> | <input type="checkbox"/>  |

ⓘ Sæt gerne flere krydser.

Blev du opfordret til at melde dig ind gennem en forening eller sammenslutning du har tilknytning til?  
F.eks. via et nyhedsbrev eller til et møde.

Ja

Nej



**Flygtningevenner**  
Sociologisk Institut  
Københavns Universitet

Genoptag senere Afslut og nulstil spørgeundersøgelsen

---

9%

Vi går nu over til at spørge til dit engagement i flygtningesagen i det hele taget og ikke blot i forbindelse med Facebook.

Hvornår engagerede du dig først i en aktivitet i forhold til flygtningesagen?

I forbindelse med eller efter at flygtningestrømmen nåede Danmark i september 2015

Jeg var aktiv før september 2015

Forrige

Næste

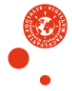

11%

Hvad får dig til at være aktiv i flygtningesagen?

|                                                            | 1 (slet ikke)         | 2                     | 3                     | 4                     | 5 (i meget høj grad)  | Ved ikke/irrelevant   |
|------------------------------------------------------------|-----------------------|-----------------------|-----------------------|-----------------------|-----------------------|-----------------------|
| Jeg er vred over de politiske beslutninger på området      | <input type="radio"/> |
| Jeg har medfølelse med flygtningene                        | <input type="radio"/> |
| Jeg oplever at mine venner påskønner at jeg er aktiv       | <input type="radio"/> |
| Jeg er indigneret over flygtningenes situation             | <input type="radio"/> |
| Det giver mening for mit liv                               | <input type="radio"/> |
| Jeg føler mig som et bedre menneske ved at hjælpe andre    | <input type="radio"/> |
| Samværet med de andre aktive flygtningevenner              | <input type="radio"/> |
| Samværet med flygtningene                                  | <input type="radio"/> |
| Når regeringen og myndighederne svigter må jeg tage ansvar | <input type="radio"/> |
| Når folk jeg synes om er aktive, må jeg også være det      | <input type="radio"/> |

13%

I forbindelse med flygtningesagen, hvilke aktiviteter har du været involveret i?

- Skrevet og kommenteret opslag på Facebook
- Liket eller delt opslag på Facebook
- Underskriftsindsamlinger
- Indsamlet og doneret tøj, møbler m.m. til flygtninge
- Indsamlet eller givet penge til flygtninge
- Tværkulturelle aktiviteter såsom fællesspisning, udflugter, undervisning o.lign
- Været særligt tilknyttet en flygtning eller flygtningefamilie, f.eks. som kontaktperson
- Deltaget i demonstrationer og events
- Deltaget i ulydighedsaktioner
- Hjulpet asylansøgere med deres asylsager, som f.eks. bisidder, tolk eller juridisk hjælp
- Haft en asylansøger eller flygtning boende privat
- Modtagelse og assistance til flygtninge netop ankommet til Danmark eller i transit
- Transporteret flygtninge som skulle ind eller ud af landet i skjul for myndighederne
- Skjult flygtninge for myndighederne
- Givet økonomisk eller på anden vis materiel støtte til flygtninge under jorden
- På anden måde hjulpet flygtninge under jorden
- Andet (skriv for at vælge)

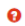

Sæt gerne flere krydser.

15%

I hvilket regi fandt følgende aktiviteter sted?

|                                                                                          | I Dansk Flygtningehjælp | I anden gruppe eller sammenslutning | Som individuelt eller privat initiativ i en sluttet kreds | Ved ikke              |
|------------------------------------------------------------------------------------------|-------------------------|-------------------------------------|-----------------------------------------------------------|-----------------------|
| Underskriftsindsamlinger                                                                 | <input type="radio"/>   | <input type="radio"/>               | <input type="radio"/>                                     | <input type="radio"/> |
| Indsamlet og doneret tøj, møbler m.m. til flygtninge                                     | <input type="radio"/>   | <input type="radio"/>               | <input type="radio"/>                                     | <input type="radio"/> |
| Indsamlet eller givet penge til flygtninge                                               | <input type="radio"/>   | <input type="radio"/>               | <input type="radio"/>                                     | <input type="radio"/> |
| Tværkulturelle aktiviteter såsom fællesspisning, udflugter, undervisning o.lign          | <input type="radio"/>   | <input type="radio"/>               | <input type="radio"/>                                     | <input type="radio"/> |
| Været særligt tilknyttet en flygtning eller flygtningefamilie, f.eks. som kontaktperson  | <input type="radio"/>   | <input type="radio"/>               | <input type="radio"/>                                     | <input type="radio"/> |
| Deltaget i demonstrationer og events                                                     | <input type="radio"/>   | <input type="radio"/>               | <input type="radio"/>                                     | <input type="radio"/> |
| Deltaget i ulydighedsaktioner                                                            | <input type="radio"/>   | <input type="radio"/>               | <input type="radio"/>                                     | <input type="radio"/> |
| Hjulpet asylansøgere med deres asylsager, som f.eks. bisidder, tolk eller juridisk hjælp | <input type="radio"/>   | <input type="radio"/>               | <input type="radio"/>                                     | <input type="radio"/> |
| Haft en asylansøger eller flygtning boende privat                                        | <input type="radio"/>   | <input type="radio"/>               | <input type="radio"/>                                     | <input type="radio"/> |
| Modtagelse og assistance til flygtninge netop ankommet til Danmark eller i transit       | <input type="radio"/>   | <input type="radio"/>               | <input type="radio"/>                                     | <input type="radio"/> |
| Transporteret flygtninge som skulle ind eller ud af landet i skjul for myndighederne     | <input type="radio"/>   | <input type="radio"/>               | <input type="radio"/>                                     | <input type="radio"/> |
| Skjult flygtninge for myndighederne                                                      | <input type="radio"/>   | <input type="radio"/>               | <input type="radio"/>                                     | <input type="radio"/> |
| Givet økonomisk eller på anden vis materiel støtte til flygtninge under jorden           | <input type="radio"/>   | <input type="radio"/>               | <input type="radio"/>                                     | <input type="radio"/> |
| På anden måde hjulpet flygtninge under jorden                                            | <input type="radio"/>   | <input type="radio"/>               | <input type="radio"/>                                     | <input type="radio"/> |

17%

Fandt følgende aktiviteter sted på eller i relation til et asylcenter?

|                                                                                          | På eller i relation til et asylcenter | Nej, det var ikke i relation til et asylcenter | Ved ikke              |
|------------------------------------------------------------------------------------------|---------------------------------------|------------------------------------------------|-----------------------|
| Indsamlet og doneret tøj, møbler m.m. til flygtninge                                     | <input type="radio"/>                 | <input type="radio"/>                          | <input type="radio"/> |
| Indsamlet eller givet penge til flygtninge                                               | <input type="radio"/>                 | <input type="radio"/>                          | <input type="radio"/> |
| Tværkulturelle aktiviteter såsom fællesspisning, udflugter, undervisning o.lign          | <input type="radio"/>                 | <input type="radio"/>                          | <input type="radio"/> |
| Været særligt tilknyttet en flygtning eller flygtningefamilie, f.eks. som kontaktperson  | <input type="radio"/>                 | <input type="radio"/>                          | <input type="radio"/> |
| Hjulpet asylansøgere med deres asylsager, som f.eks. bisidder, tolk eller juridisk hjælp | <input type="radio"/>                 | <input type="radio"/>                          | <input type="radio"/> |

Forrige

Næste

25%

Hvordan blev du påvirket af historierne om og situationen i forbindelse med flygtningenes ankomst til Danmark i september 2015?

Vurdér hvor godt følgende udsagn passer på dig, på en skala fra 1-5, hvor 1 betyder 'passer slet ikke' og 5 betyder 'passer i høj grad'.

|                                                                                        | 1                     | 2                     | 3                     | 4                     | 5                     | Ved ikke              |
|----------------------------------------------------------------------------------------|-----------------------|-----------------------|-----------------------|-----------------------|-----------------------|-----------------------|
| Det berørte mig ikke i nævneværdig grad                                                | <input type="radio"/> |
| Jeg følte medfølelse med flygtningene                                                  | <input type="radio"/> |
| Jeg følte et medansvar for at hjælpe flygtningene                                      | <input type="radio"/> |
| Jeg fik et chok, da jeg så reportagerne om flygtningesituationen                       | <input type="radio"/> |
| Jeg blev vred over at myndigheder og politikere ikke tog hånd om flygtningene          | <input type="radio"/> |
| Jeg skammer mig over at det danske samfund ikke tog bedre imod dem                     | <input type="radio"/> |
| Jeg blev vred over at flygtningene kom her til Danmark, hvor de ikke har noget at gøre | <input type="radio"/> |

Forrige

Næste



22%

Har du fungeret som organisator eller hovedansvarlig for følgende aktiviteter?

|                                                                                          | Ja                    | Nej                   | Ved ikke              |
|------------------------------------------------------------------------------------------|-----------------------|-----------------------|-----------------------|
| Underskriftsindsamlinger                                                                 | <input type="radio"/> | <input type="radio"/> | <input type="radio"/> |
| Indsamlet og doneret tøj, møbler m.m. til flygtninge                                     | <input type="radio"/> | <input type="radio"/> | <input type="radio"/> |
| Indsamlet eller givet penge til flygtninge                                               | <input type="radio"/> | <input type="radio"/> | <input type="radio"/> |
| Tværkulturelle aktiviteter såsom fællesspisning, udflugter, undervisning o.lign          | <input type="radio"/> | <input type="radio"/> | <input type="radio"/> |
| Været særligt tilknyttet en flygtning eller flygtningefamilie, f.eks. som kontaktperson  | <input type="radio"/> | <input type="radio"/> | <input type="radio"/> |
| Deltaget i demonstrationer og events                                                     | <input type="radio"/> | <input type="radio"/> | <input type="radio"/> |
| Deltaget i ulydighedsaktioner                                                            | <input type="radio"/> | <input type="radio"/> | <input type="radio"/> |
| Hjulpet asylansøgere med deres asylsager, som f.eks. bisidder, tolk eller juridisk hjælp | <input type="radio"/> | <input type="radio"/> | <input type="radio"/> |
| Haft en asylansøger eller flygtning boende privat                                        | <input type="radio"/> | <input type="radio"/> | <input type="radio"/> |
| Modtagelse og assistance til flygtninge netop ankommet til Danmark eller i transit       | <input type="radio"/> | <input type="radio"/> | <input type="radio"/> |
| Transporteret flygtninge som skulle ind eller ud af landet i skjul for myndighederne     | <input type="radio"/> | <input type="radio"/> | <input type="radio"/> |
| Skjult flygtninge for myndighederne                                                      | <input type="radio"/> | <input type="radio"/> | <input type="radio"/> |
| Givet økonomisk eller på anden vis materiel støtte til flygtninge under jorden           | <input type="radio"/> | <input type="radio"/> | <input type="radio"/> |
| På anden måde hjulpet flygtninge under jorden                                            | <input type="radio"/> | <input type="radio"/> | <input type="radio"/> |

Hvornår fandt aktiviteterne sted?

|                                                                                          | Efter flygtningestrømmen kom til Danmark i september 2015 | Før flygtningestrømmen kom til Danmark i september 2015 | Både før og efter flygtningestrømmen kom til Danmark i september 2015 | Ved ikke              |
|------------------------------------------------------------------------------------------|-----------------------------------------------------------|---------------------------------------------------------|-----------------------------------------------------------------------|-----------------------|
| Skrevet og kommenteret opslag på Facebook                                                | <input type="radio"/>                                     | <input type="radio"/>                                   | <input type="radio"/>                                                 | <input type="radio"/> |
| Liket eller delt opslag på Facebook                                                      | <input type="radio"/>                                     | <input type="radio"/>                                   | <input type="radio"/>                                                 | <input type="radio"/> |
| Underskriftsindsamlinger                                                                 | <input type="radio"/>                                     | <input type="radio"/>                                   | <input type="radio"/>                                                 | <input type="radio"/> |
| Indsamlet og doneret tøj, møbler m.m. til flygtninge                                     | <input type="radio"/>                                     | <input type="radio"/>                                   | <input type="radio"/>                                                 | <input type="radio"/> |
| Indsamlet eller givet penge til flygtninge                                               | <input type="radio"/>                                     | <input type="radio"/>                                   | <input type="radio"/>                                                 | <input type="radio"/> |
| Tværkulturelle aktiviteter såsom fællesspisning, udflugter, undervisning o.lign          | <input type="radio"/>                                     | <input type="radio"/>                                   | <input type="radio"/>                                                 | <input type="radio"/> |
| Været særligt tilknyttet en flygtning eller flygtningefamilie, f.eks. som kontaktperson  | <input type="radio"/>                                     | <input type="radio"/>                                   | <input type="radio"/>                                                 | <input type="radio"/> |
| Deltaget i demonstrationer og events                                                     | <input type="radio"/>                                     | <input type="radio"/>                                   | <input type="radio"/>                                                 | <input type="radio"/> |
| Deltaget i ulydighedsaktioner                                                            | <input type="radio"/>                                     | <input type="radio"/>                                   | <input type="radio"/>                                                 | <input type="radio"/> |
| Hjulpet asylansøgere med deres asylsager, som f.eks. bisidder, tolk eller juridisk hjælp | <input type="radio"/>                                     | <input type="radio"/>                                   | <input type="radio"/>                                                 | <input type="radio"/> |
| Haft en asylansøger eller flygtning boende privat                                        | <input type="radio"/>                                     | <input type="radio"/>                                   | <input type="radio"/>                                                 | <input type="radio"/> |
| Modtagelse og assistance til flygtninge netop ankommet til Danmark eller i transit       | <input type="radio"/>                                     | <input type="radio"/>                                   | <input type="radio"/>                                                 | <input type="radio"/> |
| Transporteret flygtninge som skulle ind eller ud af landet i skjul for myndighederne     | <input type="radio"/>                                     | <input type="radio"/>                                   | <input type="radio"/>                                                 | <input type="radio"/> |
| Skjult flygtninge for myndighederne                                                      | <input type="radio"/>                                     | <input type="radio"/>                                   | <input type="radio"/>                                                 | <input type="radio"/> |
| Givet økonomisk eller på anden vis materiel støtte til flygtninge under jorden           | <input type="radio"/>                                     | <input type="radio"/>                                   | <input type="radio"/>                                                 | <input type="radio"/> |
| På anden måde hjulpet flygtninge under jorden                                            | <input type="radio"/>                                     | <input type="radio"/>                                   | <input type="radio"/>                                                 | <input type="radio"/> |

Vi vil nu stille en række spørgsmål om dit medlemskab og aktiviteter i forskellige foreninger og sammenslutninger, herunder politiske og religiøse.

Folk tilhører nogen gange forskellige foreninger eller sammenslutninger. Er du eller har du tidligere været medlem af:

|                                                                           | Er medlem og deltager aktivt | Er medlem, men deltager ikke aktivt | Har tidligere været medlem | Har aldrig været medlem | Ved ikke              |
|---------------------------------------------------------------------------|------------------------------|-------------------------------------|----------------------------|-------------------------|-----------------------|
| Politisk parti                                                            | <input type="radio"/>        | <input type="radio"/>               | <input type="radio"/>      | <input type="radio"/>   | <input type="radio"/> |
| En fagforening, erhvervsorganisation eller en faglig sammenslutning       | <input type="radio"/>        | <input type="radio"/>               | <input type="radio"/>      | <input type="radio"/>   | <input type="radio"/> |
| En kirke, eksempelvis folkekirken, eller en anden religiøs sammenslutning | <input type="radio"/>        | <input type="radio"/>               | <input type="radio"/>      | <input type="radio"/>   | <input type="radio"/> |
| En sportsklub, fritidsklub eller kulturel forening                        | <input type="radio"/>        | <input type="radio"/>               | <input type="radio"/>      | <input type="radio"/>   | <input type="radio"/> |
| Humanitær organisation eller NGO                                          | <input type="radio"/>        | <input type="radio"/>               | <input type="radio"/>      | <input type="radio"/>   | <input type="radio"/> |
| Anden forening eller sammenslutning                                       | <input type="radio"/>        | <input type="radio"/>               | <input type="radio"/>      | <input type="radio"/>   | <input type="radio"/> |

Forrige

Næste

35%

Vi vil nu spørge dig om din deltagelse i forskellige typer af politiske og sociale aktiviteter.

Her tænker vi ikke bare på aktiviteter i relation til flygtningesagen, men også i relation til alle mulige andre sager.

Har du...

|                                                                                                        | Har det gjort det inden for det seneste år | Har gjort det tidligere  |
|--------------------------------------------------------------------------------------------------------|--------------------------------------------|--------------------------|
| Skrevet under på en underskriftindsamling                                                              | <input type="checkbox"/>                   | <input type="checkbox"/> |
| Boykottet eller bevidst købt bestemte vare af politiske, etiske eller miljømæssige grunde              | <input type="checkbox"/>                   | <input type="checkbox"/> |
| Deltaget i en demonstration                                                                            | <input type="checkbox"/>                   | <input type="checkbox"/> |
| Deltaget i et politisk møde                                                                            | <input type="checkbox"/>                   | <input type="checkbox"/> |
| Kontaktet eller forsøgt at kontakte en politiker eller en embedsmand for at fremlægge mine synspunkter | <input type="checkbox"/>                   | <input type="checkbox"/> |
| Givet eller indsamlet penge til støtte for sociale eller politiske aktiviteter                         | <input type="checkbox"/>                   | <input type="checkbox"/> |
| Kontaktet eller optrådt i medierne for at udtrykke mine synspunkter                                    | <input type="checkbox"/>                   | <input type="checkbox"/> |
| Udtrykt politiske synspunkter på Internettet                                                           | <input type="checkbox"/>                   | <input type="checkbox"/> |

 Sæt gerne flere krydser.

Forrige

Næste



**Flygtningevenner**  
Sociologisk Institut  
Københavns Universitet

Genoptag senere Afslut og nulstil spørgeundersøgelsen

37%

For de aktiviteter du har deltaget for længere tid siden end 1 år, gjorde du det så i relation til flygtningesagen eller andre sager?

|                                                                                                        | Det var kun i forhold til flygtningesagen | Det var kun i forhold til andre sager | Både i forhold til flygtningesagen og andre sager | Ved ikke              |
|--------------------------------------------------------------------------------------------------------|-------------------------------------------|---------------------------------------|---------------------------------------------------|-----------------------|
| Skrevet under på en underskriftindsamling                                                              | <input type="radio"/>                     | <input type="radio"/>                 | <input type="radio"/>                             | <input type="radio"/> |
| Boykottet eller bevidst købt bestemte vare af politiske, etiske eller miljømæssige grunde              | <input type="radio"/>                     | <input type="radio"/>                 | <input type="radio"/>                             | <input type="radio"/> |
| Deltaget i en demonstration                                                                            | <input type="radio"/>                     | <input type="radio"/>                 | <input type="radio"/>                             | <input type="radio"/> |
| Deltaget i et politisk møde                                                                            | <input type="radio"/>                     | <input type="radio"/>                 | <input type="radio"/>                             | <input type="radio"/> |
| Kontaktet eller forsøgt at kontakte en politiker eller en embedsmand for at fremlægge mine synspunkter | <input type="radio"/>                     | <input type="radio"/>                 | <input type="radio"/>                             | <input type="radio"/> |
| Givet eller indsamlet penge til støtte for sociale eller politiske aktiviteter                         | <input type="radio"/>                     | <input type="radio"/>                 | <input type="radio"/>                             | <input type="radio"/> |
| Kontaktet eller optrådt i medierne for at udtrykke mine synspunkter                                    | <input type="radio"/>                     | <input type="radio"/>                 | <input type="radio"/>                             | <input type="radio"/> |
| Udtrykt politiske synspunkter på Internettet                                                           | <input type="radio"/>                     | <input type="radio"/>                 | <input type="radio"/>                             | <input type="radio"/> |

Forrige

Næste



**Flygtningevenner**  
Sociologisk Institut  
Københavns Universitet

Genoptag senere Afslut og nulstil spørgeundersøgelsen

39%

Vi vil nu stille dig nogle spørgsmål om dig selv.

Er du:

- Kvinde
- Mand
- Jeg identificerer mig ikke som mand eller kvinde
- Vil ikke svare
- Ved ikke

Forrige

Næste

 **Flygtningevenner**  
Sociologisk Institut  
Københavns Universitet

Genoptag senere Afslut og nulstil spørgeundersøgelsen

41%

Hvad er din civilstand?

- Gift eller i et registreret partnerskab
- Bor sammen med min samlever (ikke juridisk registreret)
- Fraskilt/separeret/partnerskab opløst/enke
- Enlig
- Andet

Forrige Næste

 **Flygtningevenner**  
Sociologisk Institut  
Københavns Universitet

Genoptag senere Afslut og nulstil spørgeundersøgelsen

43%

Har du hjemmeboende børn (egne børn, stedbørn, adoptivbørn, plejebørn eller samlevers børn)?

- Ja
- Nej
- Ved ikke

Forrige Næste

 **Flygtningevenner**  
Sociologisk Institut  
Københavns Universitet

Genoptag senere Afslut og nulstil spørgeundersøgelsen

45%

Hvilken beskrivelse dækker bedst det område, hvor du bor?

- En stor by
- En forstad til eller udkanten af stor by
- En mellemstor eller mindre by
- En landsby
- En gård eller et hus på landet
- Ved ikke

Forrige

Næste

 **Flygtningevenner**  
Sociologisk Institut  
Københavns Universitet

Genoptag senere Afslut og nulstil spørgeundersøgelsen

47%

I hvilket postnummer bor du?

 Skriv fire cifre - fx 2200.

Forrige

Næste

I det følgende vil vi spørge til dine værdier.

Her er nogle beskrivelser af forskellige personer.

Marker venligst hvor meget du mener den pågældende ligner eller ikke ligner dig.

|                                                                                                                                                                 | Ligner mig slet ikke  | Ligner mig ikke       | Ligner mig lidt       | Ligner mig            | Ligner mig meget      | Ved ikke              |
|-----------------------------------------------------------------------------------------------------------------------------------------------------------------|-----------------------|-----------------------|-----------------------|-----------------------|-----------------------|-----------------------|
| Det er vigtigt for vedkommende at være rig. Vedkommende vil gerne have mange penge og dyre ting.                                                                | <input type="radio"/> |
| Vedkommende mener, det er vigtigt, at alle mennesker i verden bliver behandlet lige. Vedkommende synes, at alle skal have lige muligheder her i livet.          | <input type="radio"/> |
| Det er vigtigt for vedkommende at vise sine evner. Vedkommende ønsker, at andre mennesker skal beundre det, vedkommende gør.                                    | <input type="radio"/> |
| Det er vigtigt for vedkommende at lytte til mennesker, der er anderledes end vedkommende selv. Selv når vedkommende er uenig, vil vedkommende gerne forstå dem. | <input type="radio"/> |
| Det er meget vigtigt for vedkommende at hjælpe mennesker omkring sig. Vedkommende er interesseret i deres ve og vel.                                            | <input type="radio"/> |
| Det er vigtigt for vedkommende at have stor succes. Vedkommende håber, at andre mennesker anerkender det, vedkommende udretter.                                 | <input type="radio"/> |
| Det er vigtigt for vedkommende at få respekt fra andre. Vedkommende vil gerne have at andre gør, som vedkommende siger.                                         | <input type="radio"/> |
| Det er vigtigt for vedkommende at være loyal over for sine venner. Vedkommende ønsker at være noget for de mennesker, der er tæt på vedkommende.                | <input type="radio"/> |



50%

Der er forskellige opfattelser af folks rettigheder i et demokrati.

På en skala fra 1 til 7, hvor **1 betyder slet ikke vigtigt** og **7 betyder meget vigtigt**, hvor vigtigt er det:

|                                                                                                                                        | 1 (slet ikke vigtigt) | 2                     | 3                     | 4                     | 5                     | 6                     | 7 (meget vigtigt)     | Ved ikke              |
|----------------------------------------------------------------------------------------------------------------------------------------|-----------------------|-----------------------|-----------------------|-----------------------|-----------------------|-----------------------|-----------------------|-----------------------|
| At alle borgere har en rimelig levestandard                                                                                            | <input type="radio"/> |
| At de offentlige myndigheder respekterer og beskytter mindretals rettigheder                                                           | <input type="radio"/> |
| At borgerne får flere muligheder for at deltage, når der skal træffes politiske beslutninger                                           | <input type="radio"/> |
| At borgere har mulighed for at udøve civil ulydighed, når de er imod offentlige myndigheders handlinger                                | <input type="radio"/> |
| At offentlige myndigheder respekterer demokratiske rettigheder, uanset hvad                                                            | <input type="radio"/> |
| At personer, der har opholdt sig i landet i længere tid, men som ikke er danske statsborgere, har ret til at stemme ved folketingsvalg | <input type="radio"/> |

1: Slet ikke vigtigt, 7: Meget vigtigt.

52%

I hvilken udstrækning er du enig eller uenig i følgende udsagn:

|                                                                                                                  | Helt uenig            | Delvist uenig         | Hverken enig eller uenig | Delvis enig           | Helt enig             | Ved ikke              |
|------------------------------------------------------------------------------------------------------------------|-----------------------|-----------------------|--------------------------|-----------------------|-----------------------|-----------------------|
| Folk som jeg har ingen indflydelse på, hvad regeringen foretager sig                                             | <input type="radio"/> | <input type="radio"/> | <input type="radio"/>    | <input type="radio"/> | <input type="radio"/> | <input type="radio"/> |
| Jeg tror ikke regeringen bekymrer sig ret meget om, hvad folk som jeg mener                                      | <input type="radio"/> | <input type="radio"/> | <input type="radio"/>    | <input type="radio"/> | <input type="radio"/> | <input type="radio"/> |
| Jeg føler, at jeg har en ret god forståelse for de vigtige politiske emner i Danmark                             | <input type="radio"/> | <input type="radio"/> | <input type="radio"/>    | <input type="radio"/> | <input type="radio"/> | <input type="radio"/> |
| Jeg tror, at de fleste mennesker i Danmark er bedre informeret om politik og regeringens aktiviteter, end jeg er | <input type="radio"/> | <input type="radio"/> | <input type="radio"/>    | <input type="radio"/> | <input type="radio"/> | <input type="radio"/> |

Forrige

Næste

 **Flygtningevenner**  
Sociologisk Institut  
Københavns Universitet

Genoptag senere Afslut og nulstil spørgeundersøgelsen

54%

I politik bruges sommetider betegnelserne 'venstre' og 'højre'.  
Hvor vil du placere dig selv på denne skala, hvor 0 betyder venstre, og 10 betyder højre?

|                        |                       |                       |                       |                       |                       |                       |                       |                       |                       |                       |                       |                       |
|------------------------|-----------------------|-----------------------|-----------------------|-----------------------|-----------------------|-----------------------|-----------------------|-----------------------|-----------------------|-----------------------|-----------------------|-----------------------|
|                        | 0                     | 1                     | 2                     | 3                     | 4                     | 5                     | 6                     | 7                     | 8                     | 9                     | 10                    | Ved ikke              |
| 0: Venstre. 10: Højre. | <input type="radio"/> |

Forrige Næste

 **Flygtningevenner**  
Sociologisk Institut  
Københavns Universitet

Genoptag senere Afslut og nulstil spørgeundersøgelsen

56%

Har du ændret politisk standpunkt som konsekvens af dit engagement i flygtningesagen?

Ja  
 Nej  
 Ved ikke

Hvordan har du ændret politisk standpunkt?

Jeg mener man skal føre en mere imødekommende politik overfor flygtninge  
 Jeg mener man skal føre en strammere politik overfor flygtninge  
 Ved ikke

Forrige Næste

 **Flygtningevenner**  
Sociologisk Institut  
Københavns Universitet

Genoptag senere Afslut og nulstil spørgeundersøgelsen

58%

Betragter du dig selv som tilhørende en bestemt religion eller trosretning?

Nej

Ja, Den Danske Folkekirke

Ja, Islam

Ja, en anden religion eller trosretning (skriv):

Forrige Næste

 **Flygtningevenner**  
Sociologisk Institut  
Københavns Universitet

Genoptag senere Afslut og nulstil spørgeundersøgelsen

40%

Hvor ofte går du i kirke (eller lign.: moske, synagoge)?  
Ved dette spørgsmål bedes du se bort fra kirkebesøg i forbindelse med bryllupper, begravelser og barnedåb.

Cirka 1 gang om ugen eller oftere

Cirka 1 gang om måneden

Ved særlige højtider (fx jul og påske)

Sjældnere

Aldrig, næsten aldrig

Ved ikke

Forrige Næste

62%

Synes du i almindelighed, at man kan stole på de fleste mennesker, eller synes du, at man ikke kan være forsigtig nok, når man har med andre at gøre?

- Man kan næsten altid stole på de fleste mennesker
- Man kan som regel stole på de fleste mennesker
- Man kan som regel ikke være forsigtig nok
- Man kan aldrig være forsigtig nok
- Ved ikke

[Forrige](#)
[Næste](#)

64%

Vurdér på en skala fra 0-10 hvor stor tillid du personligt har til hver af de følgende institutioner.

|                                           | 0                     | 1                     | 2                     | 3                     | 4                     | 5                     | 6                     | 7                     | 8                     | 9                     | 10                    | Ved ikke              |
|-------------------------------------------|-----------------------|-----------------------|-----------------------|-----------------------|-----------------------|-----------------------|-----------------------|-----------------------|-----------------------|-----------------------|-----------------------|-----------------------|
| Hvor stor tillid har du til Folketinget?  | <input type="radio"/> |
| Hvor stor tillid har du til retssystemet? | <input type="radio"/> |
| Hvor stor tillid har du til politiet?     | <input type="radio"/> |
| Hvor stor tillid har du til politikere?   | <input type="radio"/> |

[Forrige](#)
[Næste](#)

66%

Har dine oplevelser og erfaringer med flygtningesagen ændret din tillid til følgende institutioner?

|              | Ja, min tillid er øget | Ja, tillid er faldet  | Nej, det har ikke ændret sig |
|--------------|------------------------|-----------------------|------------------------------|
| Folketinget  | <input type="radio"/>  | <input type="radio"/> | <input type="radio"/>        |
| Retssystemet | <input type="radio"/>  | <input type="radio"/> | <input type="radio"/>        |
| Politiet     | <input type="radio"/>  | <input type="radio"/> | <input type="radio"/>        |
| Politikere   | <input type="radio"/>  | <input type="radio"/> | <input type="radio"/>        |

Forrige

Næste

68%

I hvilket omfang synes du, at Danmark bør tillade mennesker, der tilhører en anden race eller etnisk gruppe end de fleste danskere, at flytte hertil?

- Tillade mange at flytte hertil
- Tillade en del
- Tillade nogle få
- Ikke tillade nogen
- Ved ikke

Forrige

Næste



**Flygtningevenner**  
Sociologisk Institut  
Københavns Universitet

Genoptag senere Afslut og nulstil spørgeundersøgelsen

70%

Bliver Danmark et bedre eller dårligere sted at bo af, at mennesker fra andre lande flytter hertil?

|                                                   |                       |                       |                       |                       |                       |                       |                       |                       |                       |                       |                       |                       |
|---------------------------------------------------|-----------------------|-----------------------|-----------------------|-----------------------|-----------------------|-----------------------|-----------------------|-----------------------|-----------------------|-----------------------|-----------------------|-----------------------|
|                                                   | 0                     | 1                     | 2                     | 3                     | 4                     | 5                     | 6                     | 7                     | 8                     | 9                     | 10                    | Ved ikke              |
| 0: Dårligere sted at bo.<br>10: Bedre sted at bo. | <input type="radio"/> |

Forrige

Næste



**Flygtningevenner**  
Sociologisk Institut  
Københavns Universitet

Genoptag senere Afslut og nulstil spørgeundersøgelsen

72%

Folk siger, at de følgende ting er vigtige for at være rigtig dansk. Andre siger, at de ikke er så vigtige.  
Hvor vigtig synes du, at hvert af de følgende ting er?

|                                                                                                     | Meget vigtigt         | Temmelig vigtigt      | Ikke særlig vigtigt   | Slet ikke vigtigt     | Ved ikke              |
|-----------------------------------------------------------------------------------------------------|-----------------------|-----------------------|-----------------------|-----------------------|-----------------------|
| At være født i Danmark. Hvor vigtigt er det for at være rigtig dansk?                               | <input type="radio"/> |
| At respektere danske politiske institutioner og love. Hvor vigtigt er det for at være rigtig dansk? | <input type="radio"/> |
| At have dansk familiebaggrund. Hvor vigtigt er det for at være rigtig dansk?                        | <input type="radio"/> |
| At kunne tale dansk. Hvor vigtigt er det for at være rigtig dansk?                                  | <input type="radio"/> |
| At have levet det meste af sit liv i Danmark. Hvor vigtigt er det for at være rigtig dansk?         | <input type="radio"/> |

Forrige

Næste

 **Flygtningevenner**  
Sociologisk Institut  
Københavns Universitet

Genoptag senere Afslut og nulstil spørgeundersøgelsen

74%

Til slut vil vi spørge dig om en række generelle emner.

I hvilket år er du født?

 Skriv et årstal mellem 1916 og 2016, og brug 4 cifre - fx 1980.

Forrige Næste

 **Flygtningevenner**  
Sociologisk Institut  
Københavns Universitet

Genoptag senere Afslut og nulstil spørgeundersøgelsen

76%

Er du født i Danmark?

Ja  
 Nej  
 Ved ikke

Hvilket land er du født i?

Vælg venligst...

 Vælg Andet land (nederste valgmulighed) hvis dit fødeland ikke fremgår på listen.

Hvilket år flyttede du til Danmark?  
Lad feltet stå tomt, hvis du aldrig har boet i Danmark.

 Skriv et årstal mellem 1916 og 2016, og brug 4 cifre - fx 1980.

Forrige Næste

 **Flygtningevenner**  
Sociologisk Institut  
Københavns Universitet

Genoptag senere Afslut og nulstil spørgeundersøgelsen

78%

Hvilke nationaliteter identificerer du dig med?  
Vælg op til to lande.

Nationalitet:

Nationalitet:

 F.eks. Danmark, Chile eller Tyrkiet.  
Vælg **Ikke på listen** hvis de nationaliteter du identificerer dig med ikke fremgår på listen.

Forrige Næste

 **Flygtningevenner**  
Sociologisk Institut  
Københavns Universitet

Genoptag senere Afslut og nulstil spørgeundersøgelsen

80%

Er du dansk statsborger?

Ja

Nej

Ved ikke

Forrige Næste



82%

Hvad er den højeste uddannelse du har gennemført?

- Folkeskole
- Gymnasiale uddannelser, studentereksamen, HF, HHX, HTX
- Erhvervsuddannelse, Arbejdsmarkedsuddannelser, Basisår på Erhvervsfaglige uddannelser, faglært, Social- og sundhedsassistentuddannelsen
- Kort eller mellemlang videregående uddannelse. F.eks. Erhvervsakademiuddannelser, datamatiker, professionsbachelor, diplomingeniør, sygeplejerske, skolelærer.
- Lang videregående uddannelse. F.eks. universitetsbachelor, kandidatuddannelse, Ph.d.
- Ved ikke
- Andet:

[Forrige](#)[Næste](#)

84%

Hvad er din stilling?

- Fuldtidsansat
- Deltidsansat
- Selvstændig
- Under uddannelse
- Arbejdssøgende
- Førtidspensionist
- Folkepensionist
- Asylansøger
- Andet:

[Forrige](#)[Næste](#)

Bruger du erfaringer og kompetencer fra dit arbejde (nuværende eller tidligere) eller din uddannelse i dine aktiviteter i forbindelse med flygtningesagen?

|                                                                                         | Ja                    | Nej                   |
|-----------------------------------------------------------------------------------------|-----------------------|-----------------------|
| Skrevet og kommenteret opslag på Facebook                                               | <input type="radio"/> | <input type="radio"/> |
| Liket eller delt opslag på Facebook                                                     | <input type="radio"/> | <input type="radio"/> |
| Underskriftsindsamlinger                                                                | <input type="radio"/> | <input type="radio"/> |
| Indsamlet og doneret tøj, møbler m.m. til flygtninge                                    | <input type="radio"/> | <input type="radio"/> |
| Indsamlet eller givet penge til flygtninge                                              | <input type="radio"/> | <input type="radio"/> |
| Tværkulturelle aktiviteter såsom fællesspisning, udflugter, undervisning o.lign         | <input type="radio"/> | <input type="radio"/> |
| Været særligt tilknyttet en flygtning eller flygtningefamilie, f.eks. som kontaktperson | <input type="radio"/> | <input type="radio"/> |
| Deltaget i demonstrationer og events                                                    | <input type="radio"/> | <input type="radio"/> |
| Deltaget i ulydighedsaktioner                                                           | <input type="radio"/> | <input type="radio"/> |
| Hjulpet asylsøgere med deres asylsager, som f.eks. bisidder, tolk eller juridisk hjælp  | <input type="radio"/> | <input type="radio"/> |
| Haft en asylsøger eller flygtning boende privat                                         | <input type="radio"/> | <input type="radio"/> |
| Modtagelse og assistance til flygtninge netop ankommet til Danmark eller i transit      | <input type="radio"/> | <input type="radio"/> |
| Transporteret flygtninge som skulle ind eller ud af landet i skjul for myndighederne    | <input type="radio"/> | <input type="radio"/> |
| Skjult flygtninge for myndighederne                                                     | <input type="radio"/> | <input type="radio"/> |
| Givet økonomisk eller på anden vis materiel støtte til flygtninge under jorden          | <input type="radio"/> | <input type="radio"/> |
| På anden måde hjulpet flygtninge under jorden                                           | <input type="radio"/> | <input type="radio"/> |

 **Flygtningevenner**  
Sociologisk Institut  
Københavns Universitet

Genoptag senere    Afslut og nulstil spørgeundersøgelsen

92%

Hvad er din samlede årsindtægt, brutto – dvs. før skat?

- Under 100.000 kr.
- 100.000 – 149.999 kr.
- 150.000 – 199.999 kr.
- 200.000 – 249.999 kr.
- 250.000 – 299.999 kr.
- 300.000 – 399.999 kr.
- 400.000 – 499.999 kr.
- 500.000 – 599.999 kr.
- 600.000 – 699.999 kr.
- 700.000 eller derover

 Med 'samlede årsindtægt' tænkes på alle former for indtægt, herunder løn, B-indkomst, børnebidrag m.v.

Forrige    Næste

 **Flygtningevenner**  
Sociologisk Institut  
Københavns Universitet

Genoptag senere    Afslut og nulstil spørgeundersøgelsen

94%

Til slut vil vi høre om vi må benytte nogle informationer om din Facebook-aktivitet til vores forskning. Det drejer sig om din offentlige profil og din venneliste.

Ønsker du at dele disse informationer med os?

- Ja
- Nej

Forrige    Næste

 **Flygtningevenner**  
Sociologisk Institut  
Københavns Universitet

Genoptag senere Afslut og nulstil spørgeundersøgelsen

96%

Log venligst ind via Facebook-knappen nedenfor.

Forrige Næste

**Tak!**  
Vi har nu forbindelse til din Facebook-profil.  
Hvis du alligevel ikke ønsker at dele dine  
informationer, så tryk 'Fortryd'.  
Ellers tryk 'Fortsæt'.

 **Flygtningevenner**  
Sociologisk Institut  
Københavns Universitet

Genoptag senere Afslut og nulstil spørgeundersøgelsen

96%

Tak for dine svar.  
Er der noget du ønsker at tilføje eller uddybe om dig selv og dit engagement i flygtningesagen?

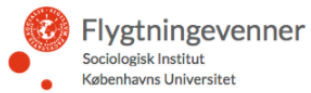

Genoptag senere

Der er ikke flere spørgsmål og dine svar er gemt.

Tusind tak for, at du tog dig tid til at besvare skemaet. Det har stor betydning for undersøgelsen.

Venlig hilsen Peter Gundelach og Jonas Toubøl

Afslut og forlad undersøgelsen
